# Supplementary material
Source: PubMed Central journal article supplement (PMC2851930)
Supplement: 0913635107_pnas.0913635107_SI.pdf [file 0913635107_pnas.0913635107_SI.pdf]

# Supporting Information

Sahoo et al. 10.1073/pnas.0913635107

## SI Text

A simple version of the MiDReG program is available at the following web site: <http://genepyramid.stanford.edu/microarray/MiDReG/>.

- Muto A, et al. (2004) The transcriptional programme of antibody class switching involves the repressor Bach2. *Nature* 429:566–571.
- Cook DN, et al. (2000) CCR6 mediates dendritic cell localization, lymphocyte homeostasis, and immune responses in mucosal tissue. *Immunity* 12:495–503.
- Forster R, et al. (1999) CCR7 coordinates the primary immune response by establishing functional microenvironments in secondary lymphoid organs. *Cell* 99:23–33.
- Ogata H, et al. (2000) The toll-like receptor protein RP105 regulates lipopolysaccharide signaling in B cells. *J Exp Med* 192:23–29.
- Sato S, et al. (1996) CD22 is both a positive and negative regulator of B lymphocyte antigen receptor signal transduction: Altered signaling in CD22-deficient mice. *Immunity* 5:551–562.
- Pan C, Baumgarth N, Parnes JR (1999) CD72-deficient mice reveal nonredundant roles of CD72 in B cell development and activation. *Immunity* 11:495–506.
- Pelanda R, Braun U, Hobeika E, Nussenzweig MC, Reth M (2002) B cell progenitors are arrested in maturation but have intact VDJ recombination in the absence of ig-alpha and ig-beta. *J Immunol* 169:865–872.
- Bugeon L, et al. (2001) Selective silencing of full-length CD80 but not IgV-CD80 leads to impaired clonal deletion of self-reactive T cells and altered regulation of immune responses. *Eur J Immunol* 31:118–127.
- Freeman GJ, et al. (1993) Uncovering of functional alternative CTLA-4 counter-receptor in B7-deficient mice. *Science* 262:907–909.
- Borriello F, et al. (1997) B7-1 and B7-2 have overlapping, critical roles in immunoglobulin class switching and germinal center formation. *Immunity* 6:303–313.
- Stork B, et al. (2007) Subcellular localization of Grb2 by the adaptor protein dok-3 restricts the intensity of Ca<sup>2+</sup> signaling in B cells. *EMBO J* 26:1140–1149.
- Lewis G, et al. (2004) Hyper IgE in new zealand black mice due to a dominant-negative CD23 mutation. *Immunogenetics* 56:564–571.
- McKenna HJ, et al. (2000) Mice lacking fIt3 ligand have deficient hematopoiesis affecting hematopoietic progenitor cells, dendritic cells, and natural killer cells. *Blood* 95:3489–3497.
- Le LQ, et al. (2001) Mice lacking the orphan G protein-coupled receptor G2A develop a late-onset autoimmune syndrome. *Immunity* 14:561–571.
- Ozaki K, et al. (2002) A critical role for IL-21 in regulating immunoglobulin production. *Science* 298:1630–1634.
- Klein U, et al. (2006) Transcription factor IRF4 controls plasma cell differentiation and class-switch recombination. *Nat Immunol* 7:773–782.
- Mittrucker HW, et al. (1997) Requirement for the transcription factor LSIRF/IRF4 for mature B and T lymphocyte function. *Science* 275:540–543.
- Park EJ, et al. (2007) Aberrant activation of integrin alpha4beta7 suppresses lymphocyte migration to the gut. *J Clin Invest* 117:2526–2538.
- Wagner N, et al. (1996) Critical role for beta7 integrins in formation of the gut-associated lymphoid tissue. *Nature* 382:366–370.
- Dal Porto JM, Burke K, Cambier JC (2004) Regulation of BCR signal transduction in B-1 cells requires the expression of the src family kinase lck. *Immunity* 21:443–453.
- Frances R, Tumang JR, Rothstein TL (2005) B-1 cells are deficient in lck: Defective B cell receptor signal transduction in B-1 cells occurs in the absence of elevated lck expression. *J Immunol* 175:27–31.
- Coste A, et al. (2006) Absence of the steroid receptor coactivator-3 induces B-cell lymphoma. *EMBO J* 25:2453–2464.
- Urbanek P, Wang ZQ, Fetka I, Wagner EF, Busslinger M (1994) Complete block of early B cell differentiation and altered patterning of the posterior midbrain in mice lacking Pax5/BSAP. *Cell* 79:901–912.
- Matsuda A, et al. (1998) Disruption of lymphocyte function and signaling in CD45-associated protein-null mice. *J Exp Med* 187:1863–1870.
- Arana E, et al. (2008) Activation of the small GTPase Rac2 via the B cell receptor regulates B cell adhesion and immunological-synapse formation. *Immunity* 28:88–99.
- Croker BA, et al. (2002) The Rac2 guanosine triphosphatase regulates B lymphocyte antigen receptor responses and chemotaxis and is required for establishment of B-1a and marginal zone B lymphocytes. *J Immunol* 168:3376–3386.
- Su GH, et al. (1997) Defective B cell receptor-mediated responses in mice lacking the ets protein, spi-B. *EMBO J* 16:7118–7129.
- Cheng AM, et al. (1995) Syk tyrosine kinase required for mouse viability and B-cell development. *Nature* 378:303–306.
- Saijo K, et al. (2003) Essential role of src-family protein tyrosine kinases in NF-kappaB activation during B cell development. *Nat Immunol* 4:274–279.
- Turner M, et al. (1995) Perinatal lethality and blocked B-cell development in mice lacking the tyrosine kinase syk. *Nature* 378:298–302.
- Yasuda T, et al. (2008) Erk kinases link pre-B cell receptor signaling to transcriptional events required for early B cell expansion. *Immunity* 28:499–508.
- Harris DP, Goodrich S, Gerth AJ, Peng SL, Lund FE (2005) Regulation of IFN-gamma production by B effector 1 cells: Essential roles for T-bet and the IFN-gamma receptor. *J Immunol* 174:6781–6790.
- Liu N, Ohnishi N, Ni L, Akira S, Bacon KB (2003) CpG directly induces T-bet expression and inhibits IgG1 and IgE switching in B cells. *Nat Immunol* 4:687–693.
- Anton IM, et al. (2002) WIP deficiency reveals a differential role for WIP and the actin cytoskeleton in T and B cell activation. *Immunity* 16:193–204.
- Wang JH, et al. (1998) Aiolos regulates B cell activation and maturation to effector state. *Immunity* 9:543–553.
- Christerson LB, et al. (2002) p115 rho GTPase activating protein interacts with MEKK1. *J Cell Physiol* 192:200–208.
- Fujimoto M, et al. (2008) Immunological profile in a family with nephrogenic diabetes insipidus with a novel 11 kb deletion in AVPR2 and ARHGAP4 genes. *BMC Med Genet* 9:42.
- Sanchez-Perez I, Benitah SA, Martinez-Gomariz M, Lacal JC, Perona R (2002) Cell stress and MEKK1-mediated c-jun activation modulate NFkappaB activity and cell viability. *Mol Biol Cell* 13:2933–2945.
- Texido G, et al. (2000) The B-cell-specific src-family kinase blk is dispensable for B-cell development and activation. *Mol Cell Biol* 20:1227–1233.
- Tretter T, Ross AE, Dordai DI, Desiderio S (2003) Mimicry of pre-B cell receptor signaling by activation of the tyrosine kinase blk. *J Exp Med* 198:1863–1873.
- Han P, Goularte OD, Rufner K, Wilkinson B, Kaye J (2004) An inhibitory ig superfamily protein expressed by lymphocytes and APCs is also an early marker of thymocyte positive selection. *J Immunol* 172:5931–5939.
- Liu X, et al. (2009) Cutting edge: A critical role of B and T lymphocyte attenuator in peripheral T cell tolerance induction. *J Immunol* 182:4516–4520.
- Vendel AC, et al. (2009) B and T lymphocyte attenuator regulates B cell receptor signaling by targeting syk and BLNK. *J Immunol* 182:1509–1517.
- Watanabe N, et al. (2003) BTLA is a lymphocyte inhibitory receptor with similarities to CTLA-4 and PD-1. *Nat Immunol* 4:670–679.
- Mansson R, Lagergren A, Hansson F, Smith E, Sigvardsson M (2007) The CD53 and CEACAM-1 genes are genetic targets for early B cell factor. *Eur J Immunol* 37:1365–1376.
- Tangye SG, van de Weert BC, Avery DT, Hodgkin PD (2002) CD84 is up-regulated on a major population of human memory B cells and recruits the SH2 domain containing proteins SAP and EAT-2. *Eur J Immunol* 32:1640–1649.
- Li J, et al. (2005) Phosphorylation of ACAP1 by akt regulates the stimulation-dependent recycling of integrin beta1 to control cell migration. *Dev Cell* 9:663–673.
- Yamamoto-Furusho JK, Barnich N, Xavier R, Hisamatsu T, Podolsky DK (2006) Centaurin beta1 down-regulates nucleotide-binding oligomerization domains 1- and 2-dependent NF-kappaB activation. *J Biol Chem* 281:36060–36070.
- Kartsogiannis V, et al. (2008) Osteoclast inhibitory lectin, an immune cell product that is required for normal bone physiology in vivo. *J Biol Chem* 283:30850–30860.
- Rosen DB, et al. (2008) Functional consequences of interactions between human NKR-P1A and its ligand LLT1 expressed on activated dendritic cells and B cells. *J Immunol* 180:6508–6517.
- Richter GH, Mollweide A, Hanewinkel K, Zobywalski C, Burdach S (2009) CD25 blockade protects T cells from activation-induced cell death (AICD) via maintenance of TOSO expression. *Scand J Immunol* 70:206–215.
- Davis RS, et al. (2002) Definition of an fc receptor-related gene (FcRX) expressed in human and mouse B cells. *Int Immunol* 14:1075–1083.
- Pan Z, et al. (2007) Studies of a germinal center B-cell expressed gene, GCET2, suggest its role as a membrane associated adapter protein. *Br J Haematol* 137:578–590.
- Schenten D, Eger T, Pasparakis M, Rajewsky K (2006) M17, a gene specific for germinal center (GC) B cells and a prognostic marker for GC B-cell lymphomas, is dispensable for the GC reaction in mice. *Blood* 107:4849–4856.
- McIntyre KW, et al. (1996) Reduced incidence and severity of collagen-induced arthritis in interleukin-12-deficient mice. *Eur J Immunol* 26:2933–2938.
- Wu C, Ferrante J, Gatley MK, Magram J (1997) Characterization of IL-12 receptor beta1 chain (IL-12Rbeta1)-deficient mice: IL-12Rbeta1 is an essential component of the functional mouse IL-12 receptor. *J Immunol* 159:1658–1665.
- Lu TT, Cyster JG (2002) Integrin-mediated long-term B cell retention in the splenic marginal zone. *Science* 297:409–412.
- Scott LM, Priestley GV, Papayannopoulou T (2003) Deletion of alpha4 integrins from adult hematopoietic cells reveals roles in homeostasis, regeneration, and homing. *Mol Cell Biol* 23:9349–9360.
- Nakajima O, et al. (2006) FKBP133: A novel mouse FK506-binding protein homolog alters growth cone morphology. *Biochem Biophys Res Commun* 346:140–149.
- Kurnasov O, et al. (2003) Aerobic tryptophan degradation pathway in bacteria: Novel kynurenine formamidase. *FEMS Microbiol Lett* 227:219–227.
- Brdicka T, et al. (2002) Non-T cell activation linker (NTAL): A transmembrane adaptor protein involved in immunoreceptor signaling. *J Exp Med* 196:1617–1626.
- Janssen E, Zhu M, Zhang W, Koonpaew S, Zhang W (2003) LAB: A new membrane-associated adaptor molecule in B cell activation. *Nat Immunol* 4:117–123.

63. Volna P, et al. (2004) Negative regulation of mast cell signaling and function by the adaptor LAB/NTAL. *J Exp Med* 200:1001–1013.
64. Zhu M, Liu Y, Koonpaew S, Granillo O, Zhang W (2004) Positive and negative regulation of FcεpsilonRI-mediated signaling by the adaptor protein LAB/NTAL. *J Exp Med* 200:991–1000.
65. Keller SR, Davis AC, Clairmont KB (2002) Mice deficient in the insulin-regulated membrane aminopeptidase show substantial decreases in glucose transporter GLUT4 levels but maintain normal glucose homeostasis. *J Biol Chem* 277:17677–17686.
66. Graham DB, et al. (2006) Ly9 (CD229)-deficient mice exhibit T cell defects yet do not share several phenotypic characteristics associated with SLAM- and SAP-deficient mice. *J Immunol* 176:291–300.
67. Katz P, Whalen G, Kehrl JH (1994) Differential expression of a novel protein kinase in human B lymphocytes. Preferential localization in the germinal center. *J Biol Chem* 269:16802–16809.
68. Pombo CM, et al. (1995) Activation of the SAPK pathway by the human STE20 homologue germinal centre kinase. *Nature* 377:750–754.
69. Zhong J, et al. (2009) GSK3 is essential to systemic inflammation and pattern recognition receptor signaling to JNK and p38. *Proc Natl Acad Sci USA* 106:4372–4377.
70. Cerutti JM, et al. (2007) Molecular profiling of matched samples identifies biomarkers of papillary thyroid carcinoma lymph node metastasis. *Cancer Res* 67:7885–7892.
71. Suire S, et al. (2006) Gbetagammmas and the ras binding domain of p110gamma are both important regulators of PI(3)kgamma signalling in neutrophils. *Nat Cell Biol* 8:1303–1309.
72. Ishikura S, Klip A (2008) Muscle cells engage Rab8A and myosin vb in insulin-dependent GLUT4 translocation. *Am J Physiol Cell Physiol* 295:C1016–C1025.
73. Gouw LG, Reading NS, Jenson SD, Lim MS, Elenitoba-Johnson KS (2005) Expression of the rho-family GTPase gene RHOF in lymphocyte subsets and malignant lymphomas. *Br J Haematol* 129:531–533.
74. Weksberg DC, Chambers SM, Boles NC, Goodell MA (2008) CD150- side population cells represent a functionally distinct population of long-term hematopoietic stem cells. *Blood* 111:2444–2451.
75. Lee JK, Mathew SO, Vaidya SV, Kumaresan PR, Mathew PA (2007) CS1 (CRACC, CD319) induces proliferation and autocrine cytokine expression on human B lymphocytes. *J Immunol* 179:4672–4678.
76. Ling PD, et al. (2005) Mediation of Epstein-Barr virus EBNA-LP transcriptional coactivation by Sp100. *EMBO J* 24:3565–3575.
77. Zong RT, Das C, Tucker PW (2000) Regulation of matrix attachment region-dependent, lymphocyte-restricted transcription through differential localization within promyelocytic leukemia nuclear bodies. *EMBO J* 19:4123–4133.
78. Nicewonger J, Suck G, Bloch D, Swaminathan S (2004) Epstein-Barr virus (EBV) SM protein induces and recruits cellular Sp110b to stabilize mRNAs and enhance EBV lytic gene expression. *J Virol* 78:9412–9422.
79. Pan H, et al. (2005) Ipr1 gene mediates innate immunity to tuberculosis. *Nature* 434:767–772.
80. Roscioli T, et al. (2006) Mutations in the gene encoding the PML nuclear body protein Sp110 are associated with immunodeficiency and hepatic veno-occlusive disease. *Nat Genet* 38:620–622.
81. Tooley AJ, et al. (2009) Amoeboid T lymphocytes require the septin cytoskeleton for cortical integrity and persistent motility. *Nat Cell Biol* 11:17–26.
82. Ono R, et al. (2005) Disruption of Sept6, a fusion partner gene of MLL, does not affect ontogeny, leukemogenesis induced by MLL-SEPT6, or phenotype induced by the loss of Sept4. *Mol Cell Biol* 25:10965–10978.
83. Peck GR, et al. (2009) Insulin-stimulated phosphorylation of the rab GTPase-activating protein TBC1D1 regulates GLUT4 translocation. *J Biol Chem* 284:30016–30023.
84. Tsitsikov EN, et al. (2001) TRAF1 is a negative regulator of TNF signaling. Enhanced TNF signaling in TRAF1-deficient mice. *Immunity* 15:647–657.
85. Garrison JB, Samuel T, Reed JC (2009) TRAF2-binding BIR1 domain of c-IAP2/MALT1 fusion protein is essential for activation of NF-kappaB. *Oncogene* 28:1584–1593.
86. Zhang B, Wang Z, Li T, Tsitsikov EN, Ding HF (2007) NF-kappaB2 mutation targets TRAF1 to induce lymphomagenesis. *Blood* 110:743–751.
87. Xie P, Hostager BS, Munroe ME, Moore CR, Bishop GA (2006) Cooperation between TNF receptor-associated factors 1 and 2 in CD40 signaling. *J Immunol* 176:5388–5400.
88. Gardam S, Sierro F, Basten A, Mackay F, Brink R (2008) TRAF2 and TRAF3 signal adapters act cooperatively to control the maturation and survival signals delivered to B cells by the BAFF receptor. *Immunity* 28:391–401.
89. Ma X, et al. (2007) Identification of five human novel genes associated with cell proliferation by cell-based screening from an expressed cDNA ORF library. *Life Sci* 81:1141–1151.
90. King RG, Herrin BR, Justement LB (2006) Trem-like transcript 2 is expressed on cells of the myeloid/granuloid and B lymphoid lineage and is up-regulated in response to inflammation. *J Immunol* 176:6012–6021.
91. Liang J, et al. (2008) A novel CCH-zinc finger protein family regulates proinflammatory activation of macrophages. *J Biol Chem* 283:6337–6346.
92. Minagawa K, et al. (2007) Deregulation of a possible tumour suppressor gene, ZC3H12D, by translocation of IGK@ in transformed follicular lymphoma with t(2;6)(p12;q25). *Br J Haematol* 139:161–163.
93. Hou JC, Pessin JE (2007) Ins (endocytosis) and outs (exocytosis) of GLUT4 trafficking. *Curr Opin Cell Biol* 19:466–473.
94. Antonescu CN, Foti M, Sauvonnnet N, Klip A (2009) Ready, set, internalize: Mechanisms and regulation of GLUT4 endocytosis. *Biosci Rep* 29:1–11.
95. Clark MR, Massenbun D, Zhang M, Siemasko K (2003) Molecular mechanisms of B cell antigen receptor trafficking. *Ann NY Acad Sci* 987:26–37.



**Table S1. Predicted B-cell genes**

| Human gene      | Affymetrix ID                       | Mouse gene           | Affymetrix ID                      |
|-----------------|-------------------------------------|----------------------|------------------------------------|
| <i>ARHGAP4</i>  | 204425_at                           | <i>Arhgap4</i>       | 1419296_at                         |
| <i>BACH2</i>    | 227173_s_at                         | <i>Bach2</i>         | 1441657_at                         |
| <i>BLK</i>      | 206255_at                           | <i>Blk</i>           | 1422775_at                         |
| <i>BTLA</i>     | 236226_at                           | <i>Btla</i>          | 1455656_at                         |
| <i>CCR6</i>     | 206983_at                           | <i>Ccr6</i>          | 1450357_a_at                       |
| <i>CCR7</i>     | 206337_at                           | <i>Ccr7</i>          | 1423466_at                         |
| <i>CD180</i>    | 206206_at                           | <i>Cd180</i>         | 1421547_at                         |
| <i>CD22</i>     | 217422_s_at                         | <i>Cd22</i>          | 1419769_at, 1419768_at             |
| <i>CD53</i>     | 242946_at                           | <i>Cd53</i>          | 1459744_at                         |
| <i>CD72</i>     | 215925_s_at                         | <i>Cd72</i>          | 1426112_a_at                       |
| <i>CD79A</i>    | 205049_s_at, 1555779_a_at           | <i>Cd79a</i>         | 1418830_at                         |
| <i>CD80</i>     | 1554519_at                          | <i>Cd80</i>          | 1427717_at, 1432826_a_at           |
| <i>CD84</i>     | 211192_s_at, 211190_x_at            | <i>Cd84</i>          | 1446505_at                         |
| <i>CD86</i>     | 205686_s_at, 205685_at              | <i>Cd86</i>          | 1420404_at, 1449858_at             |
| <i>CENTB1</i>   | 205213_at                           | <i>Centb1</i>        | 1455125_at, 1434874_x_at           |
| <i>CLEC2D</i>   | 220132_s_at, 233500_x_at, 235522_at | <i>Clec2d</i>        | 1419477_at                         |
| <i>DENND1C</i>  | 221080_s_at                         | <i>Dennd1c</i>       | 1431840_at                         |
| <i>DOK3</i>     | 223553_s_at, 220320_at              | <i>Dok3</i>          | 1418096_at                         |
| <i>FAIM3</i>    | 221602_s_at                         | <i>Faim3</i>         | 1429889_at                         |
| <i>FCER2</i>    | 206759_at, 206760_s_at              | <i>Fcer2a</i>        | 1422122_at                         |
| <i>FCRLM1</i>   | 235372_at, 235401_s_at, 235400_at   | <i>Uqcrb</i>         | 1419908_at                         |
| <i>FLT3LG</i>   | 206980_s_at                         | <i>Flt3l</i>         | 1422115_a_at                       |
| <i>GCET2</i>    | 235310_at                           | <i>Gcet2</i>         | 1442582_at                         |
| <i>GPR132</i>   | 223887_at                           | <i>Gpr132</i>        | 1444233_at                         |
| <i>IL12RB1</i>  | 1552584_at                          | <i>Il12rb1</i>       | 1418166_at                         |
| <i>IL21R</i>    | 221658_s_at, 219971_at              | <i>Il21r</i>         | 1450456_at                         |
| <i>IRF4</i>     | 204562_at, 216986_s_at              | <i>Irf4</i>          | 1421173_at                         |
| <i>ITGA4</i>    | 205884_at, 205885_s_at              | <i>Itga4</i>         | 1450155_at                         |
| <i>ITGB7</i>    | 205718_at                           | <i>Itgb7</i>         | 1418741_at                         |
| <i>KIAA0674</i> | 76897_s_at                          | <i>C430014M02Rik</i> | 1441486_at                         |
| <i>KYNU</i>     | 204385_at, 210663_s_at              | <i>Kynu</i>          | 1451903_at, 1430570_at             |
| <i>LAT2</i>     | 221581_s_at                         | <i>Lat2</i>          | 1426169_a_at                       |
| <i>LCK</i>      | 204890_s_at                         | <i>Lck</i>           | 1457917_at                         |
| <i>LNPEP</i>    | 207904_s_at                         | <i>Lnpep</i>         | 1443907_at                         |
| <i>LY9</i>      | 210370_s_at, 231124_x_at            | <i>Ly9</i>           | 1449156_at                         |
| <i>MAP4K2</i>   | 204936_at                           | <i>Map4k2</i>        | 1434833_at                         |
| <i>MGC10986</i> | 218600_at                           | <i>0610025L06Rik</i> | 1460738_at                         |
| <i>NCOA3</i>    | 209062_x_at                         | <i>2010305B15Rik</i> | 1448027_at                         |
| <i>NUP153</i>   | 1559064_at                          | <i>Nup153</i>        | 1441689_at                         |
| <i>PAX5</i>     | 221969_at                           | <i>Pax5</i>          | 1459916_at                         |
| <i>PIK3R5</i>   | 227645_at, 220566_at                | <i>Pik3r5</i>        | 1434980_at                         |
| <i>PTPRCAP</i>  | 204960_at                           | <i>Ptprcap</i>       | 1448511_at                         |
| <i>RAB8B</i>    | 219210_s_at                         | <i>Rab8b</i>         | 1446103_at                         |
| <i>RAC2</i>     | 207419_s_at                         | <i>Rac2</i>          | 1440208_at                         |
| <i>RHOF</i>     | 1554539_a_at, 222812_s_at           | <i>LOC330189</i>     | 1441510_at                         |
| <i>SLAMF1</i>   | 206181_at                           | <i>Slamf1</i>        | 1425571_at                         |
| <i>SLAMF7</i>   | 234306_s_at                         | <i>Slamf7</i>        | 1453472_a_at                       |
| <i>SP100</i>    | 210219_at                           | <i>Sp100</i>         | 1451821_a_at                       |
| <i>SP110</i>    | 208392_x_at                         | <i>5031415C07Rik</i> | 1429562_at, 1429563_x_at           |
| <i>SPI-B</i>    | 205861_at                           | <i>Spi-b</i>         | 1460407_at                         |
| <i>SYK</i>      | 209269_s_at                         | <i>Syk</i>           | 1457239_at                         |
| <i>Sept1</i>    | 227552_at                           | <i>Sept1</i>         | 1449898_at                         |
| <i>Sept6</i>    | 212415_at, 241093_at, 212413_at     | <i>Sept6</i>         | 1445665_at                         |
| <i>TBC1D1</i>   | 1568713_a_at                        | <i>Tbc1d1</i>        | 1447016_at                         |
| <i>TBX21</i>    | 220684_at                           | <i>Tbx21</i>         | 1449361_at                         |
| <i>TRAF1</i>    | 205599_at                           | <i>Traf1</i>         | 1423602_at                         |
| <i>TRAF3IP3</i> | 205804_s_at                         | <i>Traf3ip3</i>      | 1434573_at                         |
| <i>TREML2</i>   | 219748_at                           | <i>Trem12</i>        | 1444718_at                         |
| <i>WASPIP</i>   | 202665_s_at                         | <i>Waspip</i>        | 1446905_at                         |
| <i>ZC3H12D</i>  | 1559263_s_at                        | <i>Zc3h12d</i>       | 1458504_at                         |
| <i>ZC3HAV1</i>  | 220104_at                           | <i>Zc3hav1</i>       | 1431909_at                         |
| <i>ZNFN1A3</i>  | 221092_at                           | <i>Zfn1a3</i>        | 1441088_at, 1453378_at, 1436649_at |

This table lists all 62 predicted B-cell precursor genes using MiDRoG with their Affymetrix ID in human U133 Plus 2.0 and mouse 430 2.0 platform.

**Table S2. Knockout phenotypes show defects in B-cell function and differentiation**

|                |                                                                                                                                                                                                                            |
|----------------|----------------------------------------------------------------------------------------------------------------------------------------------------------------------------------------------------------------------------|
| <i>Bach2</i>   | Failed to undergo efficient class-switch recombination (1)                                                                                                                                                                 |
| <i>Ccr6</i>    | B-cell numbers are reduced in Peyer's patches from <i>Ccr6</i> <sup>-/-</sup> mice (2)                                                                                                                                     |
| <i>Ccr7</i>    | Impaired migration of lymphocytes (3)                                                                                                                                                                                      |
| <i>Cd180</i>   | Impaired proliferative and humoral immune responses of <i>RP105</i> -deficient B cells to LPS (4)                                                                                                                          |
| <i>Cd22</i>    | B cells from <i>Cd22</i> -deficient mice exhibited the cell surface phenotype and augmented intracellular calcium responses characteristic of chronically stimulated B cells, as occurs in <i>SHP1</i> -defective mice (5) |
| <i>Cd72</i>    | In the bone marrow of <i>Cd72</i> <sup>-/-</sup> mice, there was a reduction in the number of mature recirculating B cells and an accumulation of pre-B cells (6)                                                          |
| <i>Cd79a</i>   | In the absence of Ig-alpha, B-cell development does not progress beyond the progenitor stage (7)                                                                                                                           |
| <i>Cd80</i>    | Provide costimulatory signal (8, 9)                                                                                                                                                                                        |
| <i>Cd86</i>    | Mice lacking only <i>B7-1</i> or <i>B7-2</i> mounted high-titer antigen-specific IgG responses when immunized in complete Freund's adjuvant (10)                                                                           |
| <i>Dok3</i>    | <i>Dok-3</i> restricts the intensity of Ca <sup>2+</sup> signaling in B cells (11)                                                                                                                                         |
| <i>Fcer2a</i>  | <i>Fcer2a</i> -deficient mice show exaggerated IgE responses and airway hyper-responsiveness (12)                                                                                                                          |
| <i>Flt3l</i>   | Significantly reduced numbers of myeloid and B-lymphoid progenitors were noted in the bone marrow of <i>Flt3l</i> <sup>-/-</sup> mice (13)                                                                                 |
| <i>Gpr132</i>  | Abnormal expansion of both T and B lymphocytes (14)                                                                                                                                                                        |
| <i>Il21r</i>   | Mice deficient in the receptor for <i>Il-21</i> ( <i>Il-21r</i> ) have normal lymphoid development; after immunization, these animals have higher production of the immunoglobulin IgE (15)                                |
| <i>Irf4</i>    | <i>Irf4</i> -deficient B cells had impaired expression of activation-induced deaminase and lacked class-switch recombination (16, 17)                                                                                      |
| <i>Itgb7</i>   | Lymphocyte trafficking to the gut (18, 19)                                                                                                                                                                                 |
| <i>Lck</i>     | Reduced threshold for B-cell receptor (BCR) signaling in B1 cell (20, 21)                                                                                                                                                  |
| <i>Ncoa3</i>   | <i>Ncoa3</i> -deficient mice have B-cell and T-cell hyperproliferative disorder, have hyperactivated NF-κB, and develop B-cell lymphomas (22)                                                                              |
| <i>Pax5</i>    | Complete block of early B-cell differentiation and altered patterning of the posterior midbrain in mice lacking <i>Pax5/BSAP</i> (23)                                                                                      |
| <i>Ptprcap</i> | T and B lymphocytes showed reduced proliferation in response to antigen receptor stimulation (24)                                                                                                                          |
| <i>Rac2</i>    | <i>Rac2</i> knockout mice show decreased B-cell lymphopoiesis, reduced BCR signaling, and reduced chemotaxis (25, 26)                                                                                                      |
| <i>Spi-B</i>   | <i>Spi-B</i> <sup>-/-</sup> mice exhibit severe abnormalities in B-cell function. <i>Spi-B</i> is essential for antigen-dependent expansion of B cells (27)                                                                |
| <i>Syk</i>     | <i>Syk</i> -deficient fetal liver showed a block in B-cell development at the pro-B to pre-B-cell transition (28–31)                                                                                                       |
| <i>Tbx21</i>   | <i>Tbx21</i> knockout mice show abnormal IgG2a class switching and IFN-gamma production (32, 33)                                                                                                                           |
| <i>Waspip</i>  | Both <i>Wip</i> -deficient T and B cells show a profound defect in their subcortical actin filament networks. <i>Wip</i> is important for immunologic synapse formation and T-cell activation (34)                         |
| <i>Zfn1a3</i>  | Aiolos-null mice have hyperactivated B cells (35)                                                                                                                                                                          |

41 genes were knocked out in mice out of the total 62 predicted B-cell precursor genes. Comprehensive review of the literatures identified 26 genes whose knockout phenotype show defects in B-cell function and differentiation. A short summary of this phenotype is listed here for each of the 26 genes.

**Table S3. Detailed classification of predicted B-cell genes**

| Gene                 | Mouse knockout | B-cell phenotype | Category              | Pubmed                                 | Comment                                                                                                                                                                                                                    |
|----------------------|----------------|------------------|-----------------------|----------------------------------------|----------------------------------------------------------------------------------------------------------------------------------------------------------------------------------------------------------------------------|
| <i>ARHGAP4</i>       |                |                  | Signal transducer     | 12181357,12115726, 18489790            | <i>ARHGAP4</i> can inhibit <i>MEKK1</i> , which can activate NF- $\kappa$ B-mediated cell survival (36–38)                                                                                                                 |
| <i>BACH2</i>         | Yes            | Yes              | Transcription factor  | 15152264                               | Failed to undergo efficient class-switch recombination (1)                                                                                                                                                                 |
| <i>BLK</i>           | Yes            |                  | Signal transducer     | 14662906, 10648608                     | Involved in signaling downstream of the pre-BCR (39, 40)                                                                                                                                                                   |
| <i>BTLA</i>          | Yes            |                  | Cell surface receptor | 19155498, 12796776, 19342624, 15128774 | <i>BTLA</i> regulates B-cell receptor signaling by targeting <i>Syk</i> and <i>BLNK</i> (41–44)                                                                                                                            |
| <i>CCR6</i>          | Yes            | Yes              | Cell surface receptor | 10843382                               | B-cell numbers are reduced in Peyer's patches from <i>CCR6</i> <sup>-/-</sup> mice (2)                                                                                                                                     |
| <i>CCR7</i>          | Yes            | Yes              | Cell surface receptor | 10520991                               | Impaired migration of lymphocytes (3)                                                                                                                                                                                      |
| <i>CD180 (RP105)</i> | Yes            | Yes              | Cell surface receptor | 10880523                               | Impaired proliferative and humoral immune responses of <i>RP105</i> -deficient B cells to LPS (4)                                                                                                                          |
| <i>CD22</i>          | Yes            | Yes              | Cell surface receptor | 8986715                                | B cells from <i>CD22</i> -deficient mice exhibited the cell surface phenotype and augmented intracellular calcium responses characteristic of chronically stimulated B cells, as occurs in <i>SHP1</i> -defective mice (5) |
| <i>CD53</i>          |                |                  | Cell surface receptor | 17429843                               | <i>CD53</i> is a genetic target for early B-cell factor (45)                                                                                                                                                               |
| <i>CD72</i>          | Yes            | Yes              | Cell surface receptor | 10549631                               | In the bone marrow of <i>CD72</i> <sup>-/-</sup> mice, there was a reduction in the number of mature recirculating B cells and an accumulation of pre-B cells (6)                                                          |
| <i>CD79A</i>         | Yes            | Yes              | Cell surface receptor | 12097390                               | In the absence of Ig-alpha, B-cell development does not progress beyond the progenitor stage (7)                                                                                                                           |
| <i>CD80</i>          | Yes            | Yes              | Cell surface receptor | 11169445, 7694362                      | Provide costimulatory signal (8, 9)                                                                                                                                                                                        |
| <i>CD84</i>          |                |                  | Cell surface receptor | 12115647                               | <i>CD84</i> is expressed in B cells. Member of the <i>CD2</i> subset of the Ig superfamily (46)                                                                                                                            |
| <i>CD86</i>          | Yes            | Yes              | Cell surface receptor | 9075931                                | Mice lacking only <i>B7-1</i> or <i>B7-2</i> mounted high-titer antigen-specific IgG responses when immunized in complete Freund's adjuvant (10)                                                                           |
| <i>CENTB1</i>        |                |                  | Metabolic process     | 16256741, 17005562                     | Inhibits NF- $\kappa$ B and activates <i>Itgb1</i> recycling to control cell migration (47, 48)                                                                                                                            |
| <i>CLEC2D</i>        | Yes            |                  | Cell surface receptor | 18453569, 18782774                     | Expressed in B cells and can be stimulated through <i>TLR9</i> , surface Ig, or <i>CD40</i> . Possible role in B cells (49, 50)                                                                                            |
| <i>DENND1C</i>       |                |                  | Unknown               |                                        | No known function for this gene                                                                                                                                                                                            |
| <i>DOK3</i>          | Yes            | Yes              | Signal transducer     | 17290227, 17363732                     | <i>Dok-3</i> restricts the intensity of Ca <sup>2+</sup> signaling in B cells (11)                                                                                                                                         |
| <i>FAIM3</i>         |                |                  | Signal transducer     | 19703010                               | Inhibits Fas-mediated apoptosis (51). GC B cells are sensitive to Fas-mediated cell death. Indirectly connected to B cells                                                                                                 |
| <i>FCER2</i>         | Yes            | Yes              | Cell surface receptor | 8041705, 8176203                       | <i>FCER2A</i> -deficient mice show exaggerated IgE responses and airway hyper-responsiveness (12)                                                                                                                          |
| <i>FCRLM1</i>        |                |                  | Cell surface receptor | 12202404                               | Whereas no function is known for this, it appears to be only expressed in B cells. Previously predicted to have a B-cell function (52)                                                                                     |
| <i>FLT3LG</i>        | Yes            | Yes              | Cytokine activity     | 10828034                               | Significantly reduced numbers of myeloid and B-lymphoid progenitors were noted in the bone marrow of <i>flt3L</i> <sup>-/-</sup> mice (13)                                                                                 |
| <i>GCET2</i>         | Yes            |                  | Metabolic process     | 17489982, 16493007                     | Expressed in GC B cells and a very useful marker of B-cell lymphoma (53, 54)                                                                                                                                               |
| <i>GPR132</i>        | Yes            | Yes              | Cell surface receptor | 11371358                               | Abnormal expansion of both T and B lymphocytes (14)                                                                                                                                                                        |
| <i>IL12RB1</i>       | Yes            |                  | Cell surface receptor | 8977288, 9257825                       | Previously predicted to have a functional role in B cells. May have a functional role in IL12 signaling during the B-cell response (55, 56)                                                                                |
| <i>IL21R</i>         | Yes            | Yes              | Cell surface receptor | 12446913                               | Mice deficient in the receptor for <i>IL-21</i> ( <i>IL-21R</i> ) have normal lymphoid development; after immunization, these animals have higher production of the immunoglobulin IgE (15)                                |
| <i>IRF4</i>          | Yes            | Yes              | Transcription factor  | 16767092, 8999800                      | <i>IRF4</i> -deficient B cells had impaired expression of activation-induced deaminase and lacked class-switch recombination (16, 17)                                                                                      |







**Table S5. Antibodies used**

| Antigen       | Clone     | Conjugate    | Source        | Population       |
|---------------|-----------|--------------|---------------|------------------|
| Ly6c          | AL-21     | FITC         | BD Pharmingen | CLP, Fr.A, B     |
| Flk2          | A2F10     | PE           | eBioscience   | CLP, Fr.A, B     |
| CD19          | 1D3       | PECy5.5      | eBioscience   | CLP, Fr.A, B     |
| B220          | 6B2       | PECy7        | eBioscience   | CLP, Fr.A, B     |
| CD27          | LG.7F9    | APC          | eBioscience   | CLP, Fr.A, B     |
| CD11c         | N418      | Alexa750-APC | eBioscience   | CLP, Fr.A, B     |
| BP-1 (Ly51)   | 6C3       | Biotin       | BD Pharmingen | CLP, Fr.A, B     |
| IL7Ra         | A7R34     | Biotin       | House         | CLP, Fr.A, B     |
| NK1.1         | PK136     | PECy5        | eBioscience   | CLP, Fr.A, B     |
|               | PK136     | PECy7        | eBioscience   | CLP, Fr.A, B     |
| IgD           | 11-26c    | FITC         | eBioscience   | Fr.C, D, E       |
| CD43          | 1B11      | PE           | BD Pharmingen | Fr.C, D, E       |
| IgM           |           | APC          | eBioscience   | Fr.C, D, E       |
| CD23          | B3B4      | PE           | eBioscience   | T1, T2, mature B |
| IgM           | II/41     | PECy5        | eBioscience   | T1, T2, mature B |
| CD93 (AA4.1)  | AA4.1     | APC          | eBioscience   | T1, T2, mature B |
| CD3           | 2C11      | PECy5        | eBioscience   | T1, T2, mature B |
| CD4           | GK1.5     | Pacific Blue | House         | T1, T2, mature B |
| CD8           | 53.6.7    | Pacific Blue | House         | T1, T2, mature B |
| Ter119        | TER119    | Pacific Blue | House         | T1, T2, mature B |
| CD11b         |           | Pacific Blue | House         | T1, T2, mature B |
| Gr1           |           | Pacific Blue | House         | T1, T2, mature B |
| Mac1          | M1/70     | PECy5        | eBioscience   | T1, T2, mature B |
| GL7           | GL-7      | biotin       | eBioscience   | GC               |
| CD38          | 90        | APC          | eBioscience   | GC               |
| NP            | NP        | PE           | Biosearch     | GC               |
| ckit          | 2B8       | PECy7        | eBioscience   | HSC, MPP         |
|               | 2B8       | APCCy7       | eBioscience   | HSC, MPP         |
| Sca1          | E13-161-7 | Alexa680     | House         | HSC, MPP         |
| CD34          | RAM34     | Biotin       | House         | HSC, MPP         |
|               | RAM34     | FITC         | House         | HSC, MPP         |
| Streptavidin  |           | Qdot605      | Invitrogen    |                  |
| Goat anti-rat |           | Alexa488     | Invitrogen    |                  |

House: conjugates made within the Weissman lab.

**Table S6. Primers used for real-time PCR**

| Gene name         | Forward primer (5' to 3') | Reverse primer (5' to 3') |
|-------------------|---------------------------|---------------------------|
| <i>Beta-actin</i> | GTCTGAGGCCTCCCTTTT        | GGGAGACCAAAGCCTTCATA      |
| <i>Aicda</i>      | GGGAAAGTGGCATTACCTA       | GAACCCAATTCTGGCTGTGT      |
| <i>Arhgap4</i>    | CCAGTCTGAGGCAGCTTACC      | GCTGAGGTGAAGCAATAGGC      |
| <i>Bach2</i>      | CAGCCAAACTGTTCCAGTGA      | GGTGATTATAAGCGCCTGGA      |
| <i>Cd19</i>       | TAGGTTACAGGTCCCAAGG       | ATCACCCCTTGCCTAAGACC      |
| <i>Cd53</i>       | CTGACTTGCTTAAAGGAAAAGTGG  | TTCCTATAGAGCACCACGAA      |
| <i>Cd72</i>       | CTACGGCCTGCCAATTTTTA      | AGAGTGAGGGAGTGCTGGAG      |
| <i>cKit</i>       | CATCCATCCAGCACAAATCAG     | TGACAAAGTCGGGATCAATG      |
| <i>Fcrlm1</i>     | GAAGCTGCATCTGGTGATGA      | CACAGAAGCTTCGCTCCTC       |
| <i>Il21r</i>      | ATGTGTCCATGTCCAGACCA      | ATTTGCAAAGGAAGGGGACT      |
| <i>Itga4</i>      | CAGAGCCACACCCAAAAGTT      | GGGCCACGTTCTCATCTTTA      |
| <i>Itgb7</i>      | GTACAGGCGCTTTGAGAAGG      | TGTTGCTGCTTCCAGTTG        |
| <i>Ly9</i>        | AAAAGAGCGGCACAAACACC      | GGTAGGGGCTTTCAGGGAC       |
| <i>Nup153</i>     | ATACTGGGGAGTTGGTGCTG      | GGGCTTCTCAACATGAGAAA      |
| <i>Pax5</i>       | TTGGAGGATCCAAACCAAAG      | CTGATCTCCAGGCAAACAT       |
| <i>Ptprcap</i>    | CCCATGCATGTTATGGTGAA      | TGATGTAAGGGTGGGGTGAC      |
| <i>Sept6</i>      | TGCAGTCACAGAAGGGTTGA      | AGGCCAACCATGAAAATGAT      |
| <i>Spi-B</i>      | CATGGGGTTGCAAAGAGTTT      | GCAGAATCAGAACCCAGAGC      |
| <i>Syk</i>        | CCTCTCTGCACCCAGACTA       | ATCTGCAGTGGGTCAGTGTG      |
| <i>Tbc1d1</i>     | TGGGGAGTAATGAGGAAACG      | CCCCCTTAAGTCCCAAATTC      |
| <i>Traf3ip3</i>   | TCTGAAGGAGGACTGGAGGA      | GCTCTCCAGCTCTCTGTGCT      |
| <i>Waspi</i>      | CTCCAGCAGGGAGAAGATGA      | CATTGCACATTTGGATCGTC      |
| <i>Zc3h12d</i>    | AGGCACCAAGAATGGATCAG      | CAAGGCCGGCAAGTTACTA       |
| <i>Ebf1</i>       | CCCTCCAATGCAAGTAGCTC      | TCTGACAACTGGTGCGAAAG      |
| <i>Pax5</i>       | TTGGAGGATCCAAACCAAAG      | CTGATCTCCAGGCAAACAT       |
| <i>VpreB</i>      | CATGCTGCTGGCCTATCTCA      | TACAGGAGAGGCGGATGGTG      |
| <i>Rag1</i>       | GAGGTTCCGCTACGACTCTG      | TCTTGGGATCTCATGCCTTC      |
| <i>Lambda5</i>    | TGCTGCTGTTGGGTCTAGTG      | CAGCTCTGCTCCTTTCTGCT      |
| <i>E2A</i>        | ACGTTCTGGATGAGACAGG       | AAGCAGGGAGCTGTTCACTG      |

Cells were sorted into TRIzol (Invitrogen Life Technologies), and RNA was isolated according to manufacturer's instruction. cDNA was synthesized by using the Superscript III kit (Invitrogen Life Technologies) using random hexamers. Amplifications were performed by using SYBR Green PCR core reagents (Applied Biosystems), and transcript levels were quantified by using an ABI 7900 Sequence Detection Systems (Applied Biosystems). The mean ct value of triplicate reactions was normalized against the mean ct value of  $\beta$ -actin. Primers were used at 400 nM.
